# Supplementary material
Source: Elsevier journal article supplement (https://www.sciencedirect.com/science/article/pii/S1695403318301176)
Supplement: mmc1 [file S1695403318301176:mmc1.docx]

**Tabla s1: Características de los pacientes (material suplementario)**

| **Antecedentes**  -PRN  -EG  -EG <35s  -Apgar 5’  - Lactancia materna exclusiva  - Dermatitis atópica  - Convivientes domicilio | 3.295 (2.857-3295)  39 (38-40)  4 (6.7%)  10 (10-10)  31 (52.5%)  9 (15.3%)  4 (3-5) |
| --- | --- |
| **Tratamiento prehospitalario**  a) Ninguno  b) Mucolíticos  c) Broncodilatadores orales  d) Broncodilatadores inhalados  e) Corticoides sistémicos | 37 (62.7)  3 (5.1%)  1 (1.7%)  16 (27.1%)  2 (3.4%) |
| Virus respiratorios  a) VRS  b) No VRS  c) Negativo  d) No realizado | 18 (30.5%)  21 (35.6%)  5 (8.5%)  15 (25.4) |
